# Supplementary material for: Controlled synthesis and comparison of NiCo2S4/graphene/2D TMD ternary nanocomposites for high-performance supercapacitors
Source: Royal Society of Chemistry journal article supplement (doi:10.1039/c6cc03699f), 2016-01-01
Supplement: c6cc03699f1.pdf [file c6cc03699f1.pdf]

## Electronic Supplementary Information (ESI†)

### Controlled Synthesis and Comparison of NiCo<sub>2</sub>S<sub>4</sub>/graphene/2D TMDs

### Ternary Nanocomposites for High-performance Supercapacitors

Jianfeng Shen<sup>1</sup>, Pei Dong<sup>2</sup>, Robert Baines<sup>2</sup>, Xiaowei Xu<sup>1</sup>, ZhuQing Zhang<sup>1</sup>, Pulickel M. Ajayan<sup>2</sup>, Mingxin Ye<sup>1\*</sup>

<sup>1</sup> Institute of special materials and technology, Fudan University, 200433, Shanghai, China

<sup>2</sup> Department of Materials Science and NanoEngineering, Rice University, 6100 Main Street, Houston, TX 77005, USA

#### Materials

MoS<sub>2</sub> (99%) and MoSe<sub>2</sub> (99.9%) were supplied by Sigma-Aldrich. All the other chemicals were of analytical level and used as received. All aqueous solutions were prepared with ultrapure water from a Milli-Q Plus system.

#### Preparation of NiCo<sub>2</sub>S<sub>4</sub>-g-TMDs

In a typical synthesis of NiCo<sub>2</sub>S<sub>4</sub>-g-TMDs nanocomposite (take NiCo<sub>2</sub>S<sub>4</sub>-g-MoSe<sub>2</sub> as the example), firstly, 90 milligrams of graphite and MoSe<sub>2</sub> were added to a 50 mL glass vial<sup>1,2</sup>. After that, 30 mL of 1:1 isopropanol (IPA)/water was added. The mixture was then sonicated with a frequency of 40 kHz for 4 h. Subsequently, the mixture was centrifuged at 1000 r.p.m. for 10 min. The supernatants were collected and centrifuged at 4000 r.p.m. for another 10 min to remove non-exfoliated materials. Second, 2 mmol Co(NO<sub>3</sub>)<sub>2</sub>·6H<sub>2</sub>O, 1 mmol NiCl<sub>2</sub>·6H<sub>2</sub>O, and 9 mmol thiourea were dissolved in a 25 mL exfoliated MoSe<sub>2</sub> solution (IPA/water 1:1) and 25 mL of graphene solution (IPA/water 1:1). 1 mL of ammonia was added dropwise to the

solution. The mixture was magnetically stirred for 1 h and then sonicated for 1h. Next, the mixture was transferred into a Teflon-lined autoclave, sealed, and heated at 200 °C in an oven for 24 h. The product was filtered, washed with water and ethanol for three times each, and dried in vacuum at 60 °C for 12 h. As for NiCo<sub>2</sub>S<sub>4</sub>-g: no MoSe<sub>2</sub> was added. For the preparation of NiCo<sub>2</sub>S<sub>4</sub>-g-MoS<sub>2</sub>, MoSe<sub>2</sub> was replaced with MoS<sub>2</sub> (exfoliated in 7:3 IPA/water). The whole process is illustrated in Figure 1.

### **Materials characterization**

The surface morphologies of the fabricated nanocomposites were examined with a field-emission scanning electron microscope (FEI Quanta 400 ESEM FEG), including element mapping. As well, transmission electron microscope (TEM) and high-resolution TEM (HRTEM) images were obtained using a JEOL 2010, with an acceleration voltage of 200 kV. **AFM images were acquired with the equipment of Bruker Multimode 8.** X-ray photoelectron spectra (XPS) were observed on a PHI Quantera X-ray photoelectron spectrometer. Powder X-ray diffraction (XRD) analyses were performed on a Bruker D8 Advance diffractometer with Cu and Ka radiation. Raman spectra were recorded from 100 to 4000 cm<sup>-1</sup> on a Renishaw Invia Raman Microprobe, using a 514.5 nm argon ion laser. TGA was carried out with TA Q-600, from ambient temperature to 600 °C, at 10 °C/min heating rate, under argon atmosphere. **UV-Vis diffusive reflection spectra were carried out on a Shimadzu UV-3600 spectrophotometer.**

### **Working electrodes fabrication and electrochemical measurements**

Autolab 302 electrochemical workstation was used to characterize the electrochemical behaviors. In half-cell test, three-electrode glass cell with 6 M KOH as the aqueous electrolyte was conducted. 80 wt% active materials, 10 wt% carbon black and 10 wt% polyvinylidene fluoride were mixed together. Then the mixture was

further dispersed in N-methyl-2-pyrrolidone to form the homogeneous slurry which was pasted on nickel foams. After that, the foams dried at 120 °C for 12 h in a vacuum oven and the dried nickel foams were pressed to be a thin foil at a pressure of 10 MPa for 1 min. Cyclic voltammograms (CVs) and Galvanostatic charge-discharge (GCD) curves were measured with an electrochemical analyzer (Autolab 302) in 6 M KOH. The reference and counter electrodes were Ag/AgCl and platinum plate, respectively. CV curves were obtained at various scan rates (5, 10, 20, 50 and 100 mV s<sup>-1</sup>) in a potential window of 0-0.6 V. GCD curves were recorded at various current densities (1, 2, 5, 10 and 20 A g<sup>-1</sup>) in a potential window of 0-0.4 V. While in full cell test, the symmetric supercapacitor cell using filter paper as the separator was assembled to measure the device performances. The loading mass of the active materials was controlled to be about 5 mg, with the surface area of 1 cm<sup>2</sup> for each working electrode.

### Calculation of capacitance

Observing CV measurements, the capacitance (C<sub>m</sub>, F g<sup>-1</sup>) of the measured materials was calculated according the following equation:

$$C_m = \frac{\int I(V)dv}{vm\Delta V} \text{ (F g}^{-1}\text{)}$$

where m is the total mass of the electroactive material (g), v is the scan rate (V s<sup>-1</sup>), and ΔV is the potential window (V).

For the specific capacitance calculation we used the GCD curves. The measured capacitance (C<sub>m</sub>) can be calculated as:

$$C_m = \frac{I\Delta t}{m\Delta V} \text{ (F g}^{-1}\text{)}$$

where I is the discharge current (A), and Δt is the discharge time (s).

As for the prepared symmetric supercapacitor,

$$E = \frac{1}{2} \left( \frac{1000}{3600} \right) CV^2$$

$$P = \frac{E}{t_d}$$

### Supplementary figures and discussion

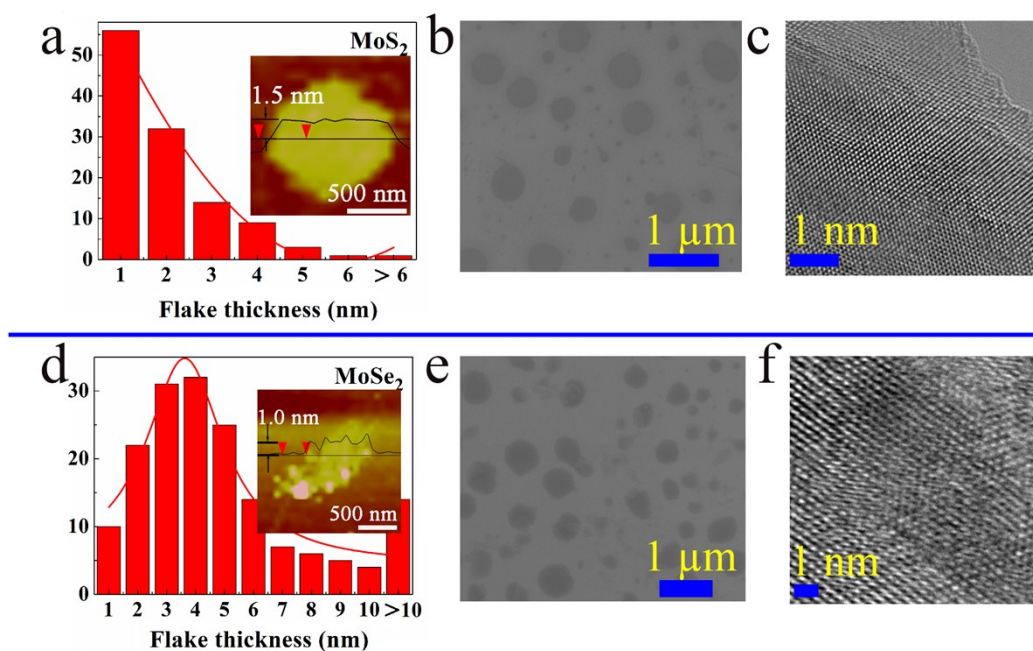

Figure S1 AFM, SEM and High resolution TEM images of MoS<sub>2</sub> (a, b, c), and MoSe<sub>2</sub> (d, e, f) nanosheets.

More than 100 MoS<sub>2</sub> and MoSe<sub>2</sub> nanosheets were randomly selected and analyzed with AFM to obtain the distribution of their thickness. It can be found that most of the MoS<sub>2</sub> and MoSe<sub>2</sub> nanosheets have few layers. Moreover, SEM and TEM images demonstrated that these MoS<sub>2</sub> and MoSe<sub>2</sub> nanosheets were with reduced lateral sizes, but still remain good crystal structure, which is also consistent with XRD results.

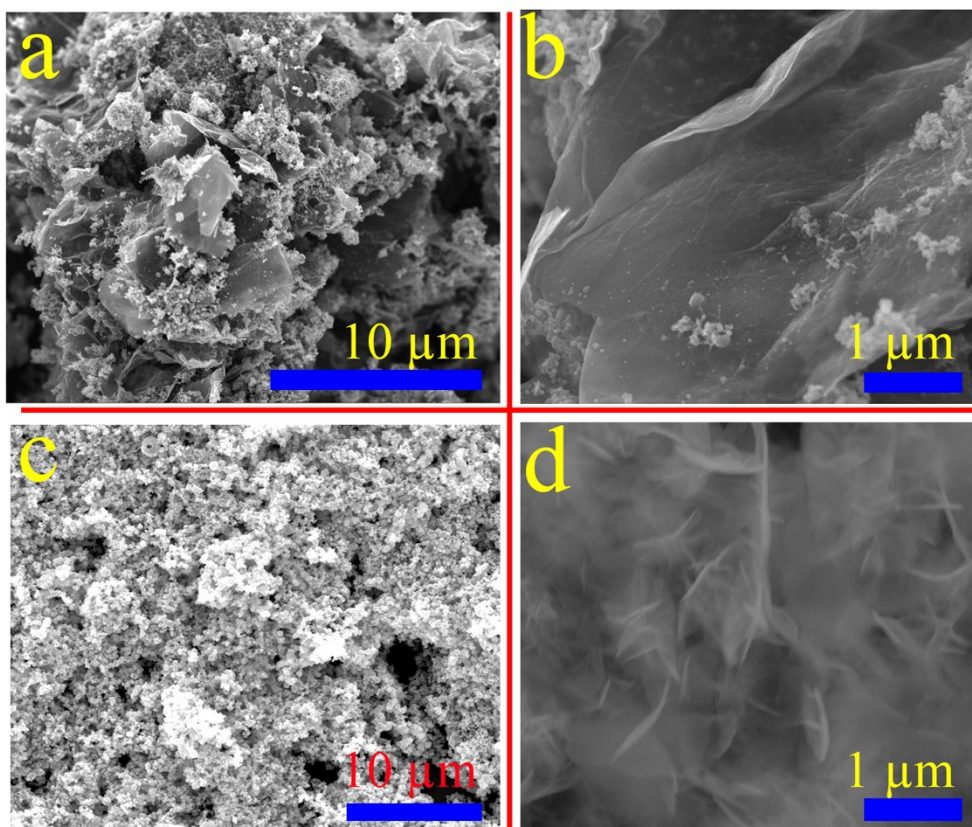

Figure S2. Low and high resolution SEM images of NiCo<sub>2</sub>S<sub>4</sub>-g (a, b) and NiCo<sub>2</sub>S<sub>4</sub>-g-MoSe<sub>2</sub> (c and d)

On one hand, it is found that NiCo<sub>2</sub>S<sub>4</sub>-g-MoSe<sub>2</sub> and NiCo<sub>2</sub>S<sub>4</sub>-g-MoS<sub>2</sub> have similar morphological structures, thus the difference of electrochemical properties of these NiCo<sub>2</sub>S<sub>4</sub>-g-TMDs mainly originates from the basic properties of the TMDs. On the other hand, it can be found that the addition of MoS<sub>2</sub> or MoSe<sub>2</sub> nanosheets will have great effect on the morphology of the nanocomposites. This phenomenon is interesting and it is consistent with the electrochemical properties that the NiCo<sub>2</sub>S<sub>4</sub>-g-TMDs have much higher capacitances than that of NiCo<sub>2</sub>S<sub>4</sub>-g.

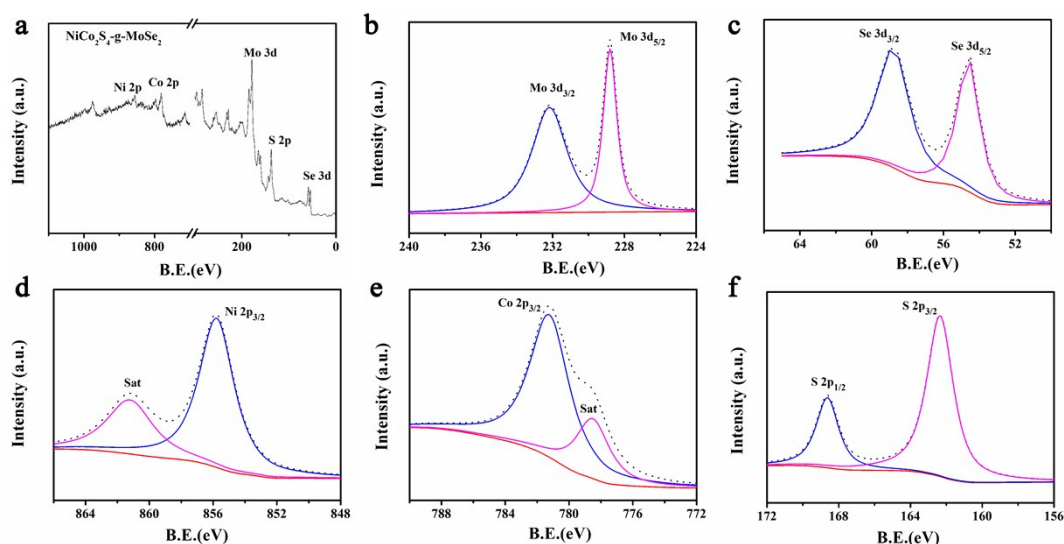

Figure S3. XPS survey spectrum of NiCo<sub>2</sub>S<sub>4</sub>-g-MoSe<sub>2</sub> (a). High-resolution XPS spectra of Mo 3d (b), Se 3d (c), Ni 2p (d), Co 2p (e), and S 2p (f) of NiCo<sub>2</sub>S<sub>4</sub>-g-MoSe<sub>2</sub>.

The XPS survey spectrum of NiCo<sub>2</sub>S<sub>4</sub>-g-MoSe<sub>2</sub> (Figure S3a) indicates that C, Ni, S, Mo, and Se elements exist in the sample. From the integration of the elements peaks, the atomic ratios of Ni: Co: S: Mo: Se: C were around 1: 1.90: 3.75: 0.92: 1.81: 6.04. Figure S3b demonstrates the two peaks at 229.0 and 232.1 eV attributed to the doublets Mo3d<sub>5/2</sub> and Mo 3d<sub>3/2</sub><sup>3</sup>. Se 3d<sub>5/2</sub> and Se 3d<sub>3/2</sub> can be clearly found at 54.2 and 58.4 eV (Figure S3c)<sup>4</sup>. The Ni 2p spectrum (Figure S1d) can be best fitted by Ni 2p<sub>3/2</sub> and its shake-up satellite<sup>5</sup>. Similarly, Figure S3e indicates the energy band (Co 2p<sub>3/2</sub>) and its satellite peak<sup>6</sup>. S 2p spectrum (Figure S1f) is divided into two main peaks (S 2p<sub>1/2</sub> and S 2p<sub>3/2</sub> at 162.1 and 168.5 eV). These peaks can be attributed to the metal-sulfur bonds in low coordination at the surface<sup>7</sup>.

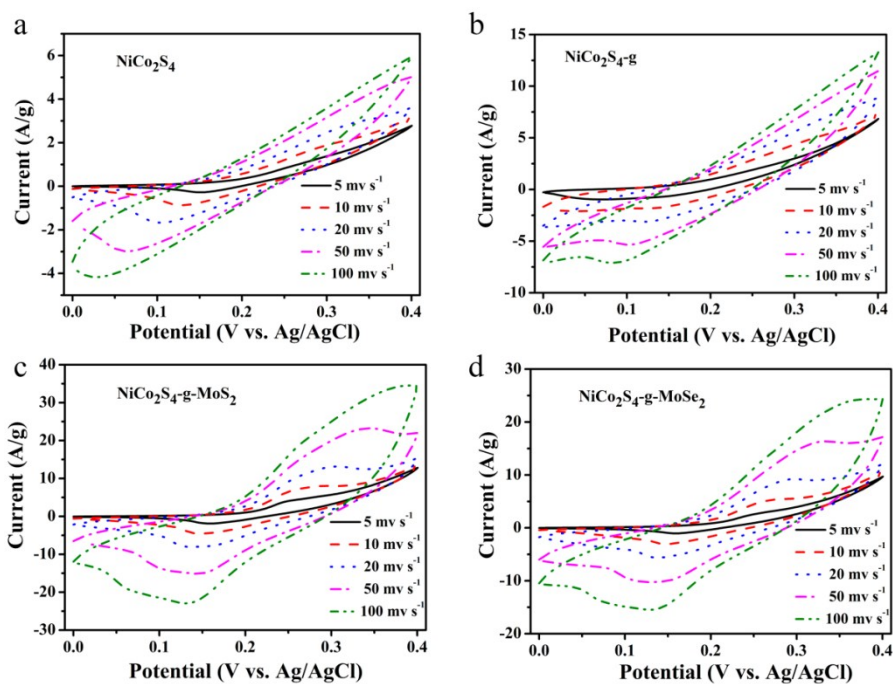

**Figure S4.** CV curves of  $\text{NiCo}_2\text{S}_4$ ,  $\text{NiCo}_2\text{S}_4\text{-g}$ ,  $\text{NiCo}_2\text{S}_4\text{-g-MoS}_2$ , and  $\text{NiCo}_2\text{S}_4\text{-g-MoSe}_2$  at different scanning rates.

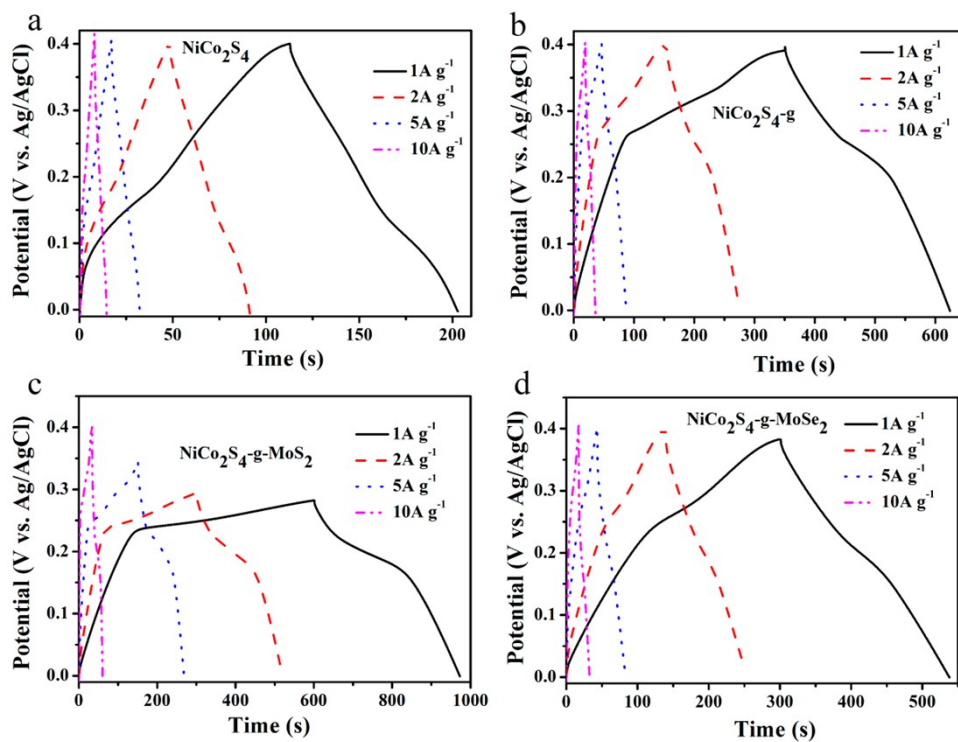

**Figure S5.** GCD curves of  $\text{NiCo}_2\text{S}_4$ ,  $\text{NiCo}_2\text{S}_4\text{-g}$ ,  $\text{NiCo}_2\text{S}_4\text{-g-MoS}_2$ , and  $\text{NiCo}_2\text{S}_4\text{-g-MoSe}_2$  at different current densities.

## References:

1. J. Shen, Y. He, J. Wu, C. Gao, K. Keyshar, X. Zhang, Y. Yang, M. Ye, R. Vajtai, J. Lou and P. M. Ajayan, *Nano Letters*, 2015, **15**, 5449-5454.
2. J. N. Coleman, M. Lotya, A. O'Neill, S. D. Bergin, P. J. King, U. Khan, K. Young, A. Gaucher, S. De, R. J. Smith, I. V. Shvets, S. K. Arora, G. Stanton, H.-Y. Kim, K. Lee, G. T. Kim, G. S. Duesberg, T. Hallam, J. J. Boland, J. J. Wang, J. F. Donegan, J. C. Grunlan, G. Moriarty, A. Shmeliov, R. J. Nicholls, J. M. Perkins, E. M. Grievson, K. Theuwissen, D. W. McComb, P. D. Nellist and V. Nicolosi, *Science*, 2011, **331**, 568-571.
3. S. Patil, A. Harle, S. Sathaye and K. Patil, *CrystEngComm*, 2014, **16**, 10845-10855.
4. H. Zhang, B. Yang, X. Wu, Z. Li, L. Lei and X. Zhang, *ACS Applied Materials & Interfaces*, 2015, **7**, 1772-1779.
5. V. H. Nguyen and J.-J. Shim, *Journal of Power Sources*, 2015, **273**, 110-117.
6. W. Hu, R. Chen, W. Xie, L. Zou, N. Qin and D. Bao, *ACS Applied Materials & Interfaces*, 2014, **6**, 19318-19326.
7. Y. Zhang, W. Sun, X. Rui, B. Li, H. T. Tan, G. Guo, S. Madhavi, Y. Zong and Q. Yan, *Small*, 2015, **11**, 3694-3702.
